# Supplementary material for: Preclinical Studies in Small Animals for Advanced Drug Delivery Using Hyperthermia and Intravital Microscopy
Source: MDPI journal article supplement (doi:10.3390/cancers13205146), 2021-10-14
Supplement: s1 [file s1]

## Supplementary Materials

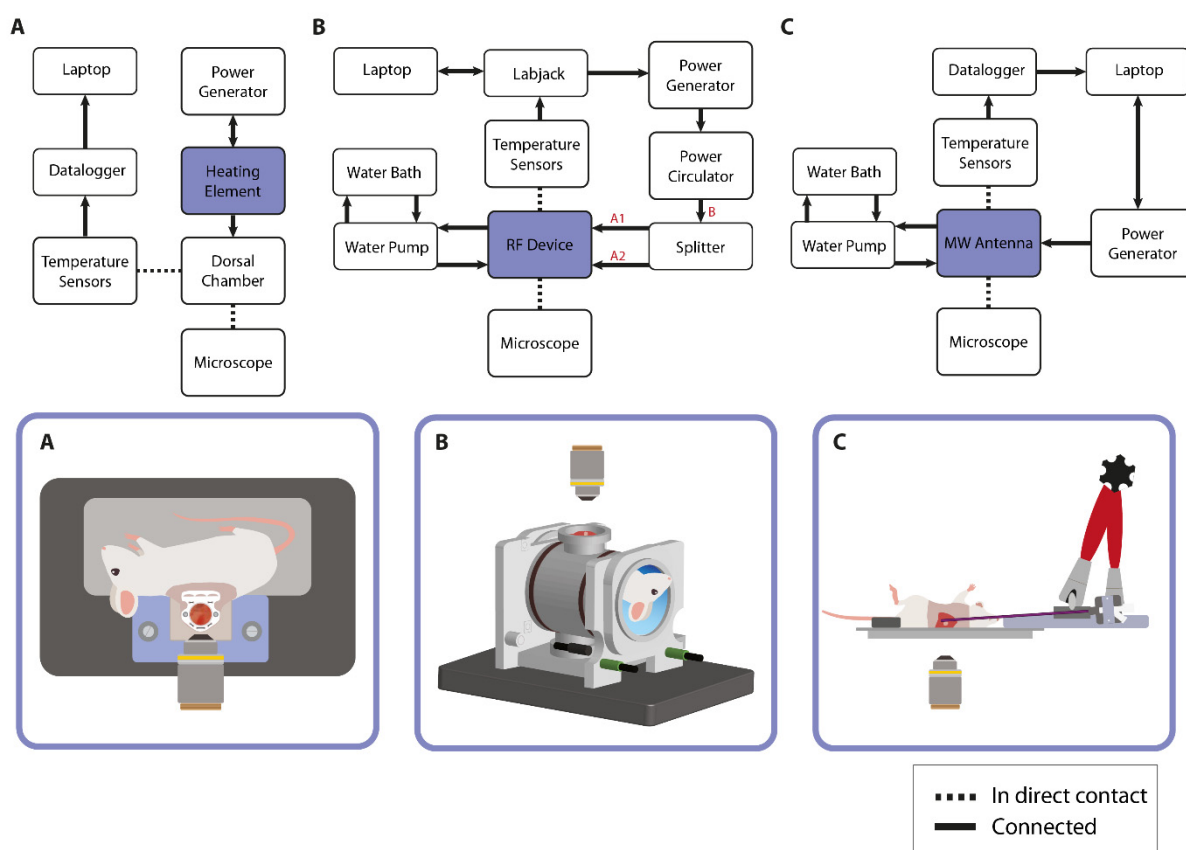

**Figure S1.** Schematic diagram of the advanced hyperthermia set-ups. A) The dorsal skinfold chamber; B) The cylindrical RF device; C) The directional microwave hyperthermia system.

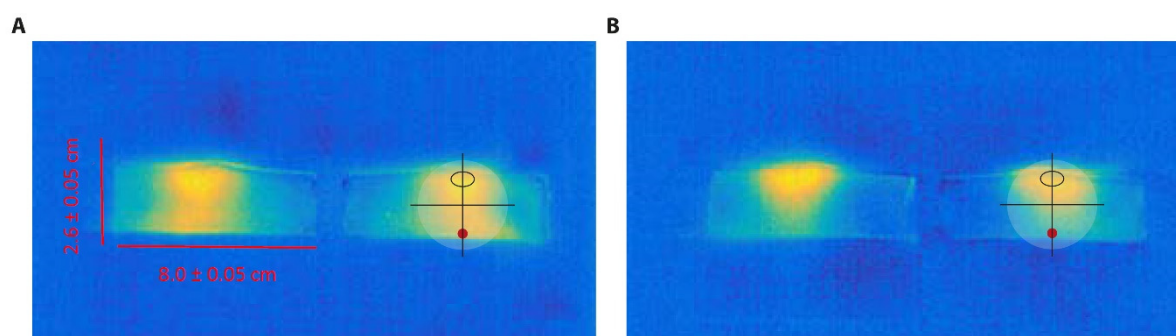

**Figure S2.** Thermographs of the heat distribution in a mouse shaped phantom. The x,z axis is drawn including the estimated position of a tumor (⊖) and the position of the central nervous system (●) in the model; A) Heating measurements performed without the addition of a salt water bolus (2.5 g/L) in the microscope viewing port indicate a large thermal zone throughout the entire phantom; B) Addition of the salted water bolus led to a more defined thermal zone, which was lifted upwards in comparison to panel A.

**Table S1.** Overview of the hyperthermia devices for preclinical small animal studies in combination with intravital imaging

|                       | <b>Dorsal Skinfold Chamber</b>                                                                                                                                          |              | <b>Cylindrical RF Device</b>                                                                                                                    |              | <b>Directional Microwave Antenna</b>                                                                                                                                                           |              |
|-----------------------|-------------------------------------------------------------------------------------------------------------------------------------------------------------------------|--------------|-------------------------------------------------------------------------------------------------------------------------------------------------|--------------|------------------------------------------------------------------------------------------------------------------------------------------------------------------------------------------------|--------------|
| <b>Method</b>         | Conduction                                                                                                                                                              |              | Radiofrequency (RF)                                                                                                                             |              | Microwave (MW)                                                                                                                                                                                 |              |
| <b>Tumor Position</b> | Superficial<br>(Dorsal Skin)                                                                                                                                            |              | Deep Seated<br>(Liver)                                                                                                                          |              | Superficial or Deep Seated<br>(Skin, Liver, Pancreas, Colon)                                                                                                                                   |              |
| <b>Setting</b>        | External heating element temperature                                                                                                                                    |              | 433.92 MHz                                                                                                                                      |              | 2450 MHz                                                                                                                                                                                       |              |
| <b>Device</b>         | <ul style="list-style-type: none"> <li>• Heating Element Temperature (°C)</li> <li>• Treatment Duration (s)</li> </ul>                                                  |              | <ul style="list-style-type: none"> <li>• Power (W)</li> <li>• Treatment Duration (s)</li> </ul>                                                 |              | <ul style="list-style-type: none"> <li>• Power (W)</li> <li>• Treatment Duration (s)</li> </ul>                                                                                                |              |
| <b>Positioning</b>    | • Chamber-to-stage holder                                                                                                                                               |              | • Bore design                                                                                                                                   |              | • TESA tape                                                                                                                                                                                    |              |
| <b>Protection</b>     | <b>Skin</b>                                                                                                                                                             | <b>Stage</b> | <b>Skin</b>                                                                                                                                     | <b>Stage</b> | <b>Skin</b>                                                                                                                                                                                    | <b>Stage</b> |
|                       | -                                                                                                                                                                       | -            | • Water Bolus                                                                                                                                   | -            | • Ultrasound gel                                                                                                                                                                               | • N/A        |
|                       |                                                                                                                                                                         |              |                                                                                                                                                 |              | • Active cooling applicator                                                                                                                                                                    |              |
| <b>Side-Effects</b>   | • Hemorrhage                                                                                                                                                            |              | • Hot Spot Formation                                                                                                                            |              | • Hemorrhage                                                                                                                                                                                   |              |
| <b>Advantages</b>     | <ul style="list-style-type: none"> <li>• Tumor Development via Optical Visualization</li> <li>• Intravital Visualization</li> <li>• Longitudinal Experiments</li> </ul> |              | <ul style="list-style-type: none"> <li>• Intravital Visualization</li> <li>• Temperature Feedback Control</li> </ul>                            |              | <ul style="list-style-type: none"> <li>• Intravital Visualization</li> <li>• Temperature Feedback Control</li> </ul>                                                                           |              |
| <b>Disadvantages</b>  | <ul style="list-style-type: none"> <li>• High Technical Complexity</li> <li>• Temperature Difference Tumor</li> </ul>                                                   |              | <ul style="list-style-type: none"> <li>• Vulnerable Device (<i>Water Bolus</i>)</li> <li>• Prone to Development of Multiple SAR Foci</li> </ul> |              | <ul style="list-style-type: none"> <li>• High Technical Complexity</li> <li>• Requires Invasive Surgery and Organ Manipulation</li> <li>• Tuning of size SAR focus not yet included</li> </ul> |              |
